# Supplementary material for: Development of hierarchical Fe3O4 magnetic microspheres as solid substrates for high sensitive immunoassays
Source: Royal Society of Chemistry journal article supplement (doi:10.1039/c8tb00846a), 2018-01-01
Supplement: c8tb00846a1.pdf [file c8tb00846a1.pdf]

## Supplementary Information

### Development of Hierarchical Fe<sub>3</sub>O<sub>4</sub> Magnetic Microspheres as Solid Substrates for High Sensitive Immunoassays

Jiao Ma,<sup>a</sup> Lingjie Song,<sup>b</sup> Hengchong Shi,<sup>b</sup> Huawei Yang,<sup>b</sup> Wei Ye,<sup>\*c</sup> Xin Guo,<sup>c</sup> Shifang Luan,<sup>\*b</sup> and Jinghua Yin<sup>b</sup>

<sup>a</sup> MOE Key Laboratory of Interface Science and Engineering in Advanced Materials and Research Center of Advanced Materials Science and Technology, Taiyuan University of Technology, Taiyuan 030024, China

<sup>b</sup> State Key Laboratory of Polymer Physics and Chemistry, Changchun Institute of Applied Chemistry, Chinese Academy of Sciences, Changchun 130022, China.

<sup>c</sup> Jiangsu Provincial Key Laboratory for Interventional Medical Devices, Huaiyin Institute of Technology, Huaian, Jiangsu, 223003 China

\* Email: sfluan@ciac.ac.cn; weiye\_ciac@126.com

### Experimental results

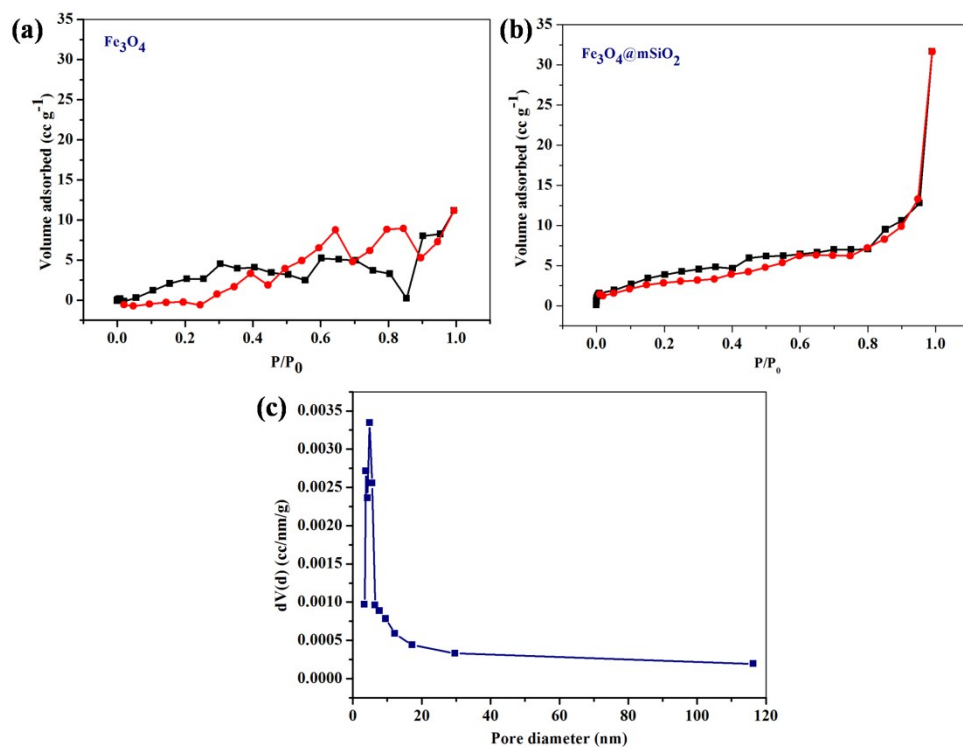

Figure S1. Nitrogen adsorption-desorption isotherms of (a)  $\text{Fe}_3\text{O}_4$  and (b)  $\text{Fe}_3\text{O}_4@\text{mSiO}_2$  microspheres; (c) Pore size distribution  $\text{Fe}_3\text{O}_4@\text{mSiO}_2$  microspheres.

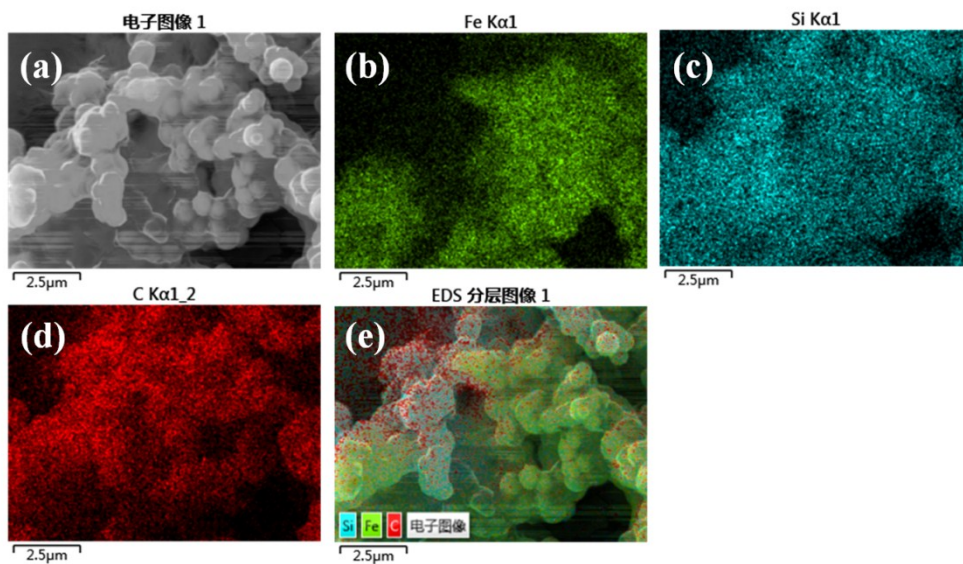

Figure S2. (a) SEM images of  $\text{Fe}_3\text{O}_4@\text{mSiO}_2@\text{p}(\text{PEGMA-co-GMA})$  microspheres; The element mapping images of (b) Fe, (c) Si and (d) C and (e) the overlay image of the three elements.
